# Supplementary material for: MiR-338-3p improved lung adenocarcinoma by AKAP12 suppression
Source: PubMed Central journal article supplement — Arch Med Sci. 2019 Dec 19;17(2):462–73. doi: 10.5114/aoms.2019.90913 (PMC7959095; doi:10.5114/aoms.2019.90913), 2019-12-19
Supplement: AMS-17-2-80934-s1.pdf [file AMS-17-2-80934-s1.pdf]

**Supplementary Table S1.** Fold change and p value for AKAP12

| Gene symbol | logFC        | P-value  |
|-------------|--------------|----------|
| ONECUT1     | 12.71223     | 5.49E-17 |
| TERT        | 13.03691     | 1.15E-20 |
| C11orf86    | 13.29445     | 1.98E-16 |
| LHFPL5      | 13.32436     | 8.42E-18 |
| CST4        | 13.63425     | 3.02E-19 |
| DMBX1       | 13.93465     | 2.45E-19 |
| DLL3        | 14.11936     | 5.72E-27 |
| PITX2       | 14.29935     | 2.59E-20 |
| ARSH        | 14.40587     | 1.08E-25 |
| AKAP12      | 16.27319     | 1.97E-34 |
| MOGAT1      | -13.30962878 | 1.28E-24 |
| CYP1A2      | -13.26869722 | 4.69E-21 |
| LY6G6F      | -13.02899273 | 1.24E-21 |
| ADCY8       | -12.8506146  | 1.85E-18 |
| KISS1R      | -12.5192951  | 3.83E-21 |
| ITLN2       | -12.36028491 | 1.09E-18 |
| CELA2B      | -12.22593814 | 4.35E-16 |
| HELT        | -12.17242195 | 3.57E-17 |
| CHRM2       | -12.13483173 | 1.51E-18 |
| OTC         | -12.09905464 | 5.55E-19 |

**Supplementary Table SII.** Selected miRs from miRanda and TargetScan

| Score                      | hsa-miR-107 | hsa-miR-613 | hsa-miR-206 | hsa-miR-338-3p |
|----------------------------|-------------|-------------|-------------|----------------|
| mirSVR score               | -0.2484     | -0.4849     | -0.4917     | -0.8009        |
| PhastCons score            | 0.5604      | 0.5675      | 0.5675      | 0.5673         |
| Context++ score percentile | 90          | 92          | 91          | 94             |

*MirSVR score and PhastCons score were obtained from miRanda. MirSVR revealed thermodynamic stability, and a lower score indicated a stronger combination of miRNA-mRNA. PhastCons revealed conservatism among different species, and a higher score indicated better conservatism. The context++ score percentile was obtained from TargetScan, and the higher the score, the greater the conservation and the greater the mRNA destabilization expected.*

**Supplementary Table SIII.** Average immunochemical staining positive score

| Number | Adjacent | Tumor |
|--------|----------|-------|
| 1      | 0.64     | 1.91  |
| 2      | 0.58     | 1.84  |
| 3      | 0.72     | 1.23  |
| 4      | 0.59     | 1.57  |
| 5      | 0.66     | 1.83  |
| 6      | 0.56     | 1.66  |
| 7      | 0.57     | 1.73  |
| 8      | 0.61     | 1.83  |
| 9      | 0.59     | 2.08  |
| 10     | 0.59     | 2.00  |
| 11     | 0.53     | 2.17  |
| 12     | 0.60     | 1.93  |
| 13     | 0.65     | 2.00  |
| 14     | 0.51     | 2.20  |
| 15     | 0.59     | 1.96  |
| 16     | 0.65     | 1.93  |
| 17     | 0.64     | 2.09  |
| 18     | 0.61     | 1.55  |
| 19     | 0.55     | 1.70  |
| 20     | 0.54     | 1.58  |
