# Supplementary figures and images for: MiR-338-3p improved lung adenocarcinoma by AKAP12 suppression
Source: PubMed Central journal article supplement — Arch Med Sci. 2019 Dec 19;17(2):462–73. doi: 10.5114/aoms.2019.90913 (PMC7959095; doi:10.5114/aoms.2019.90913), 2019-12-19

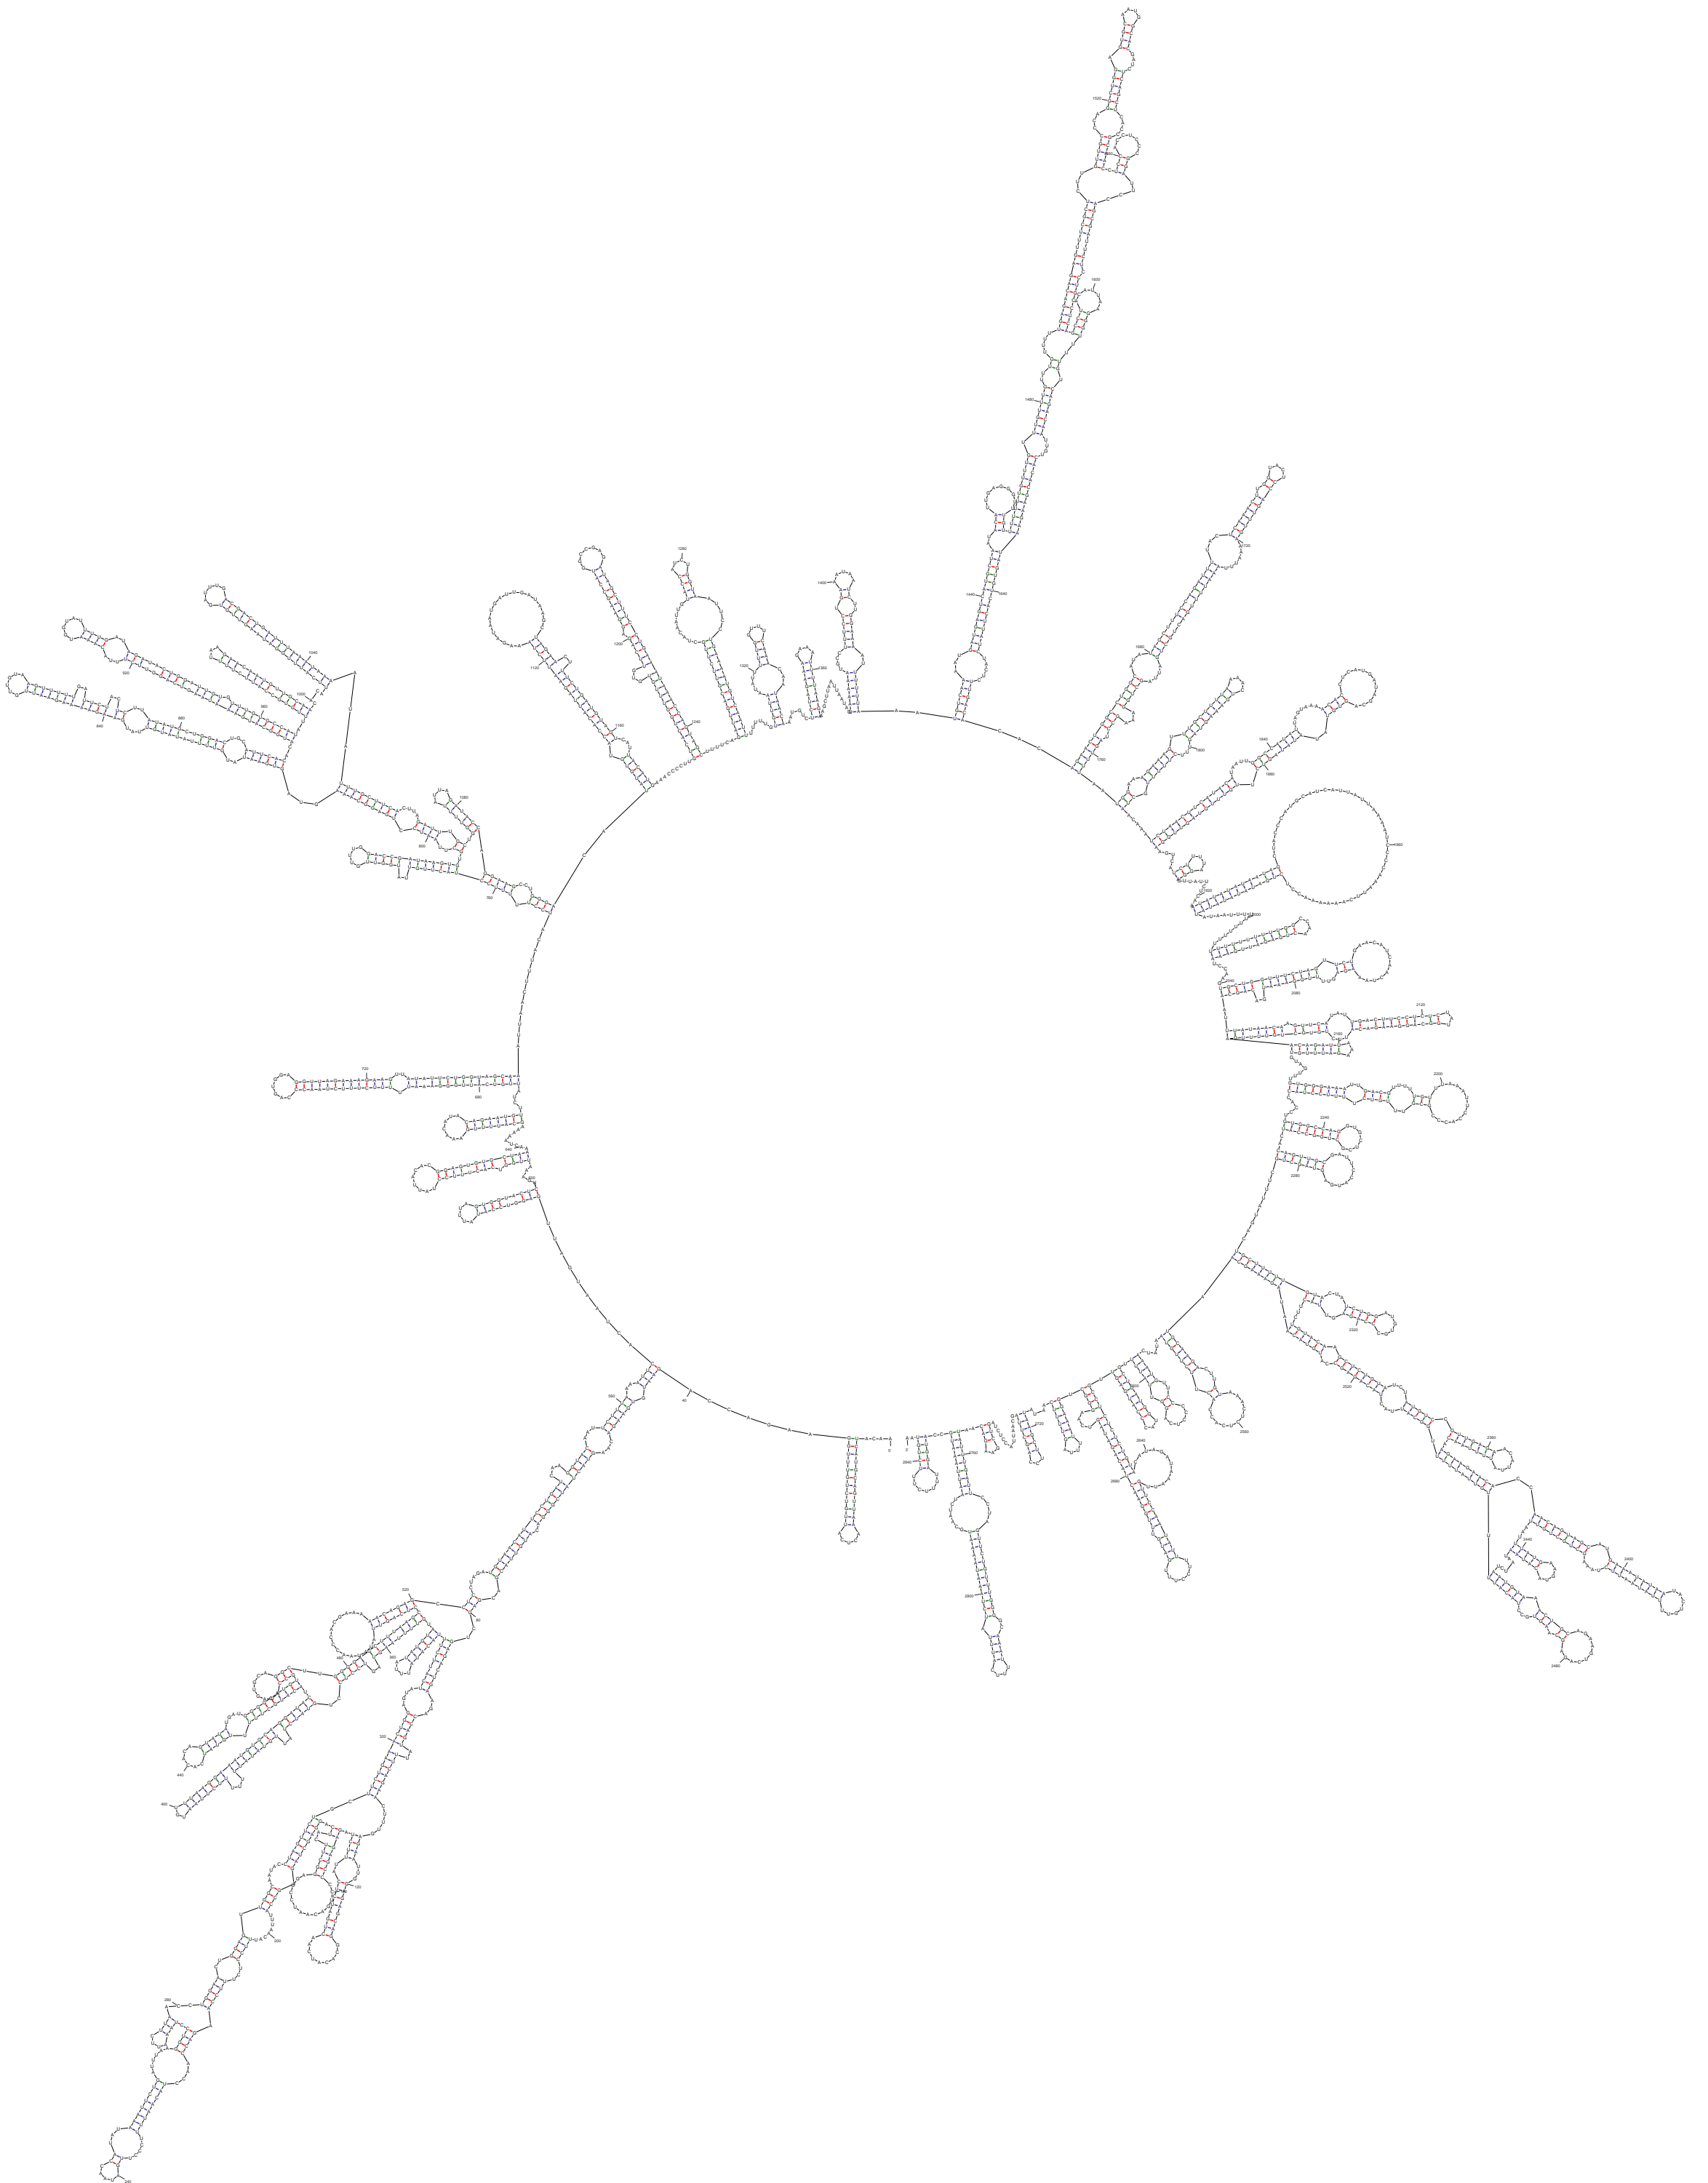

dG = -617.21 17Aug04-22-01-42

Supplement: AMS-17-2-80934-s2.pdf [file AMS-17-2-80934-s2.pdf]
